# Supplementary material
Source: Springer Nature journal article supplement (https://www.springermedizin.de/resource/supplementary/12889_2011_3015_MOESM1_ESM.pdf/9487864)
Supplement: MOESM1 [file 9487864]

**Enrolment**

Assessed for  
eligibility

Excluded:

- not meeting the criteria
- declined to participate
- other reasons

Randomized

Baseline assessment

**Allocation**

Pre-tests: 4 weekly EMA measurements during 1 month  
before the intervention

Allocated to  
WDYD intervention

Allocated to no  
intervention

**Follow-up**

Post-tests: 26 weekly EMA measurements during 9  
months after the intervention
